# Supplementary material
Source: PubMed Central journal article supplement (PMC3790048)

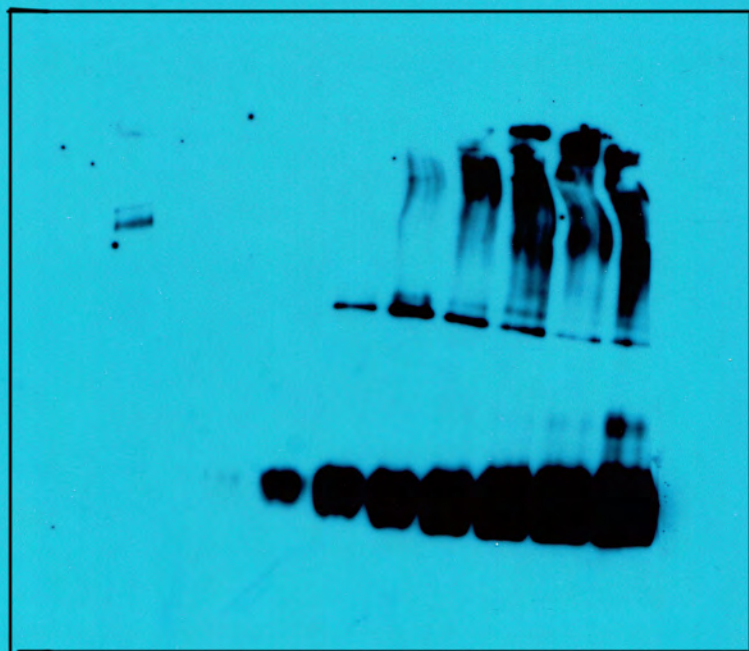

Figure 4C left panel  
Native PAGE  
IB: RIG-I



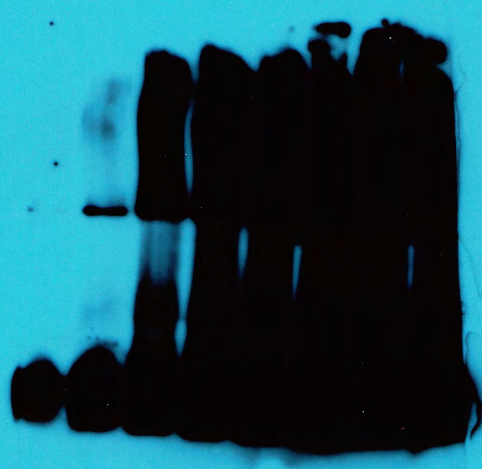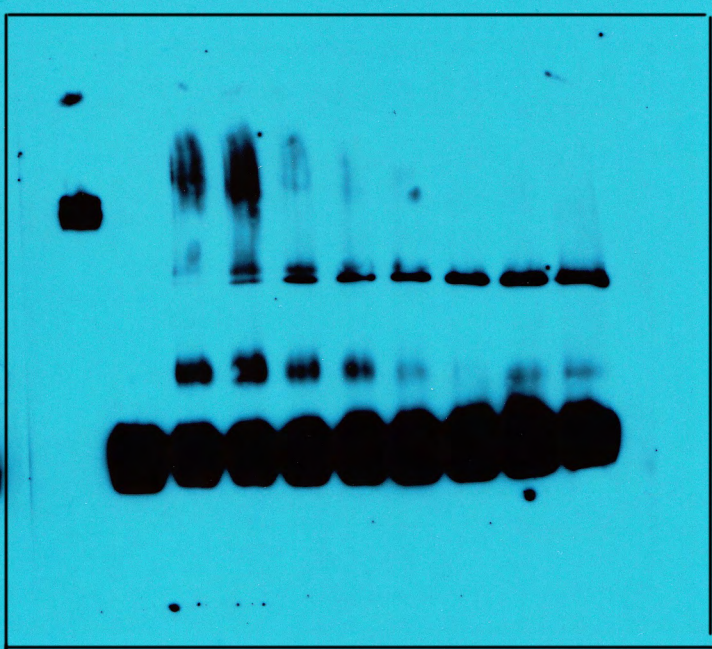

Figure 4C right panel  
Native PAGE  
IB: RIG-I



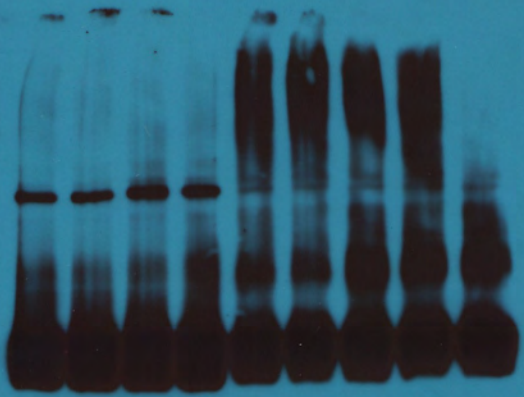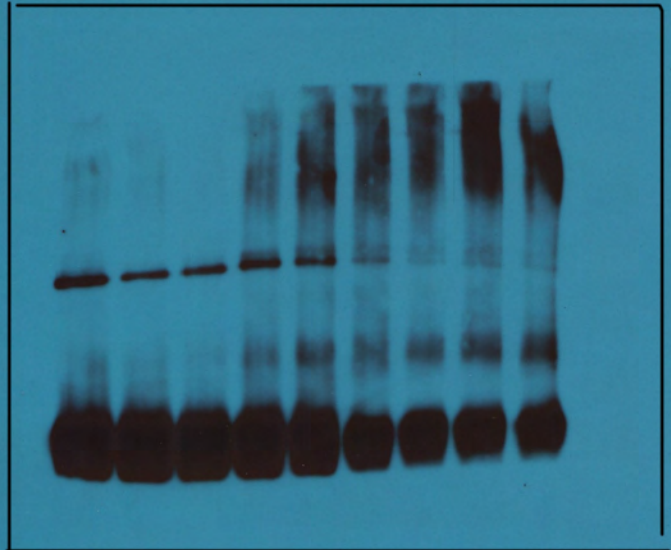

Figure 4E  
Native PAGE  
IB: RIG-I



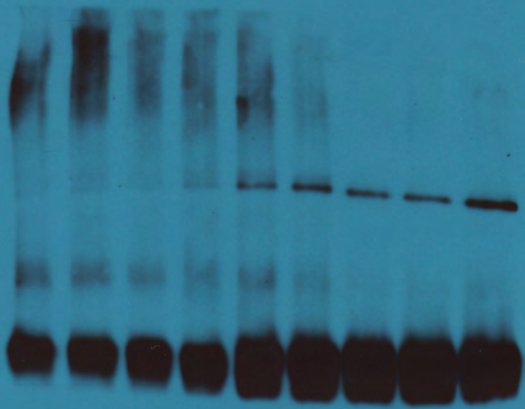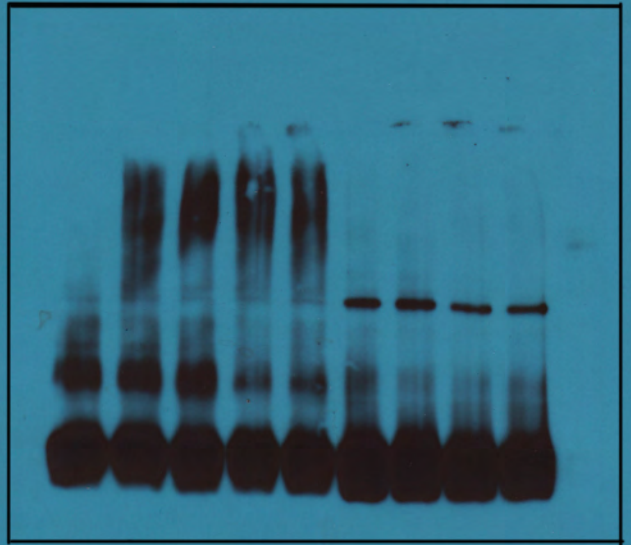

Figure 4F  
Native PAGE  
IB: RIG-I

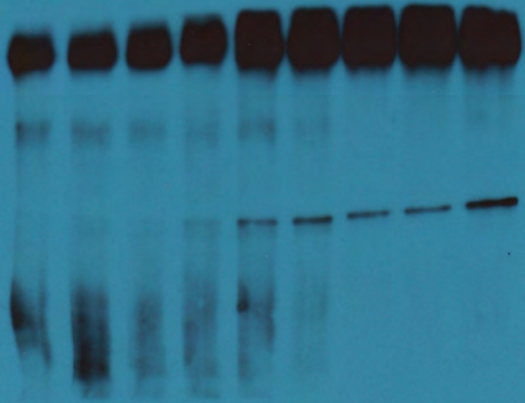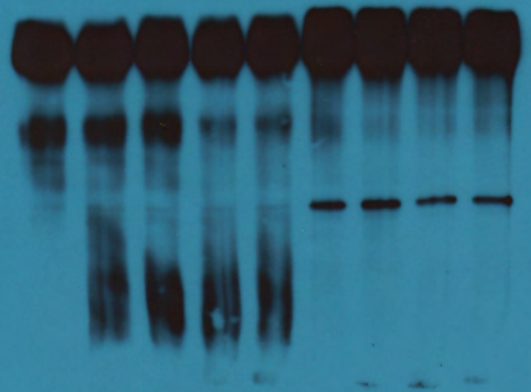



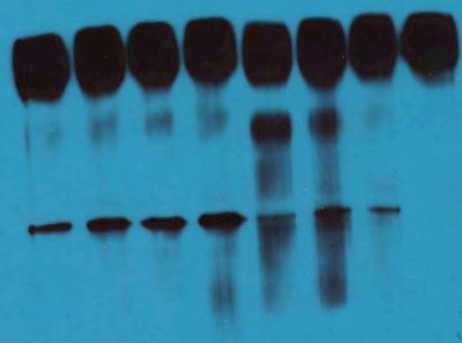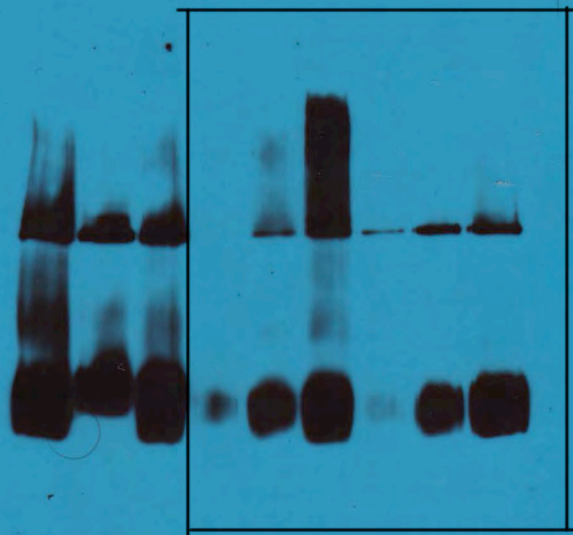

Figure 4H  
Native PAGE  
IB: RIG-I



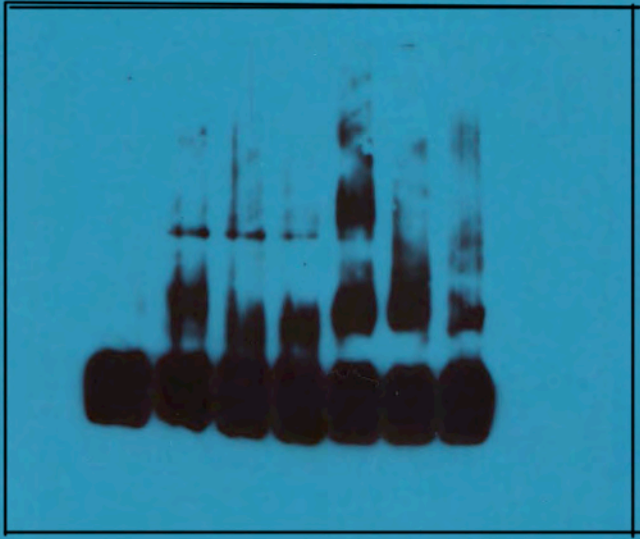

Figure 4I  
Native PAGE  
IB: RIG-I

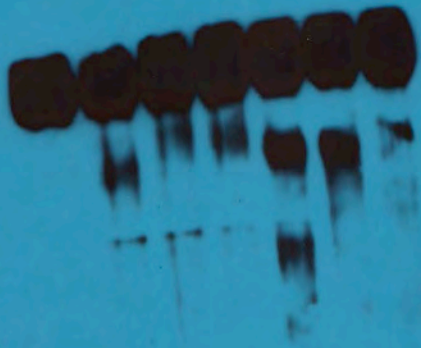

Supplement: embor2013102df4.pdf [file embor2013102df4.pdf]
