# Supplementary material
Source: PubMed Central journal article supplement (PMC3790048)

Figure 1D

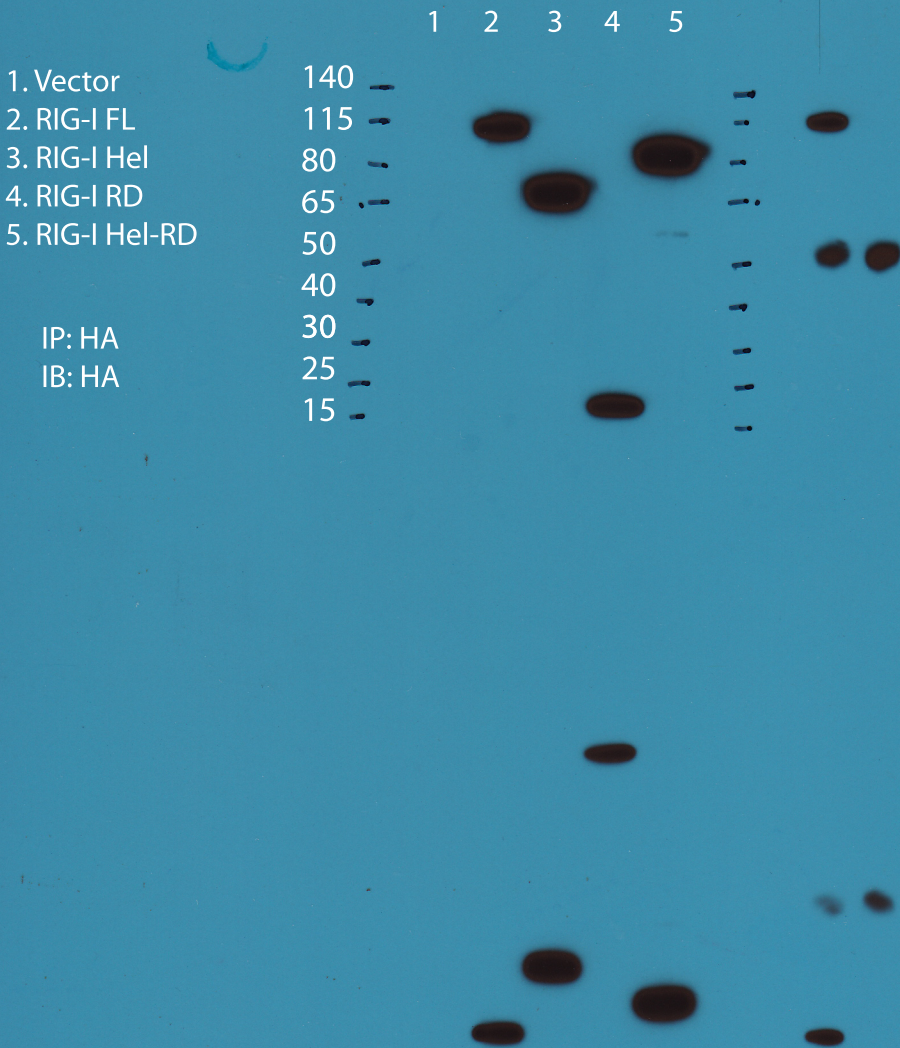

Supplement: embor2013102df1.pdf [file embor2013102df1.pdf]

Figure 3D

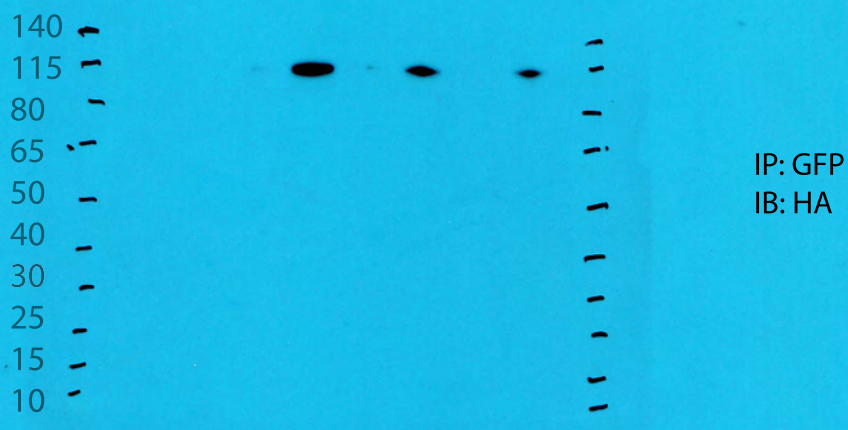

|            |     |     |    |       |       |    |   |    |   |
|------------|-----|-----|----|-------|-------|----|---|----|---|
| HA RIG-I   | +   | +   | +  | +     | +     | +  | + | +  | + |
| eYFP-RIG-I | -   | +   | +  | +     | +     | +  | + | +  | + |
| RNA        | No  | No  | WT | 46 bp | 25 bp |    |   |    |   |
|            | RNA | RNA | +  | ++    | +     | ++ | + | ++ |   |



Figure 3D

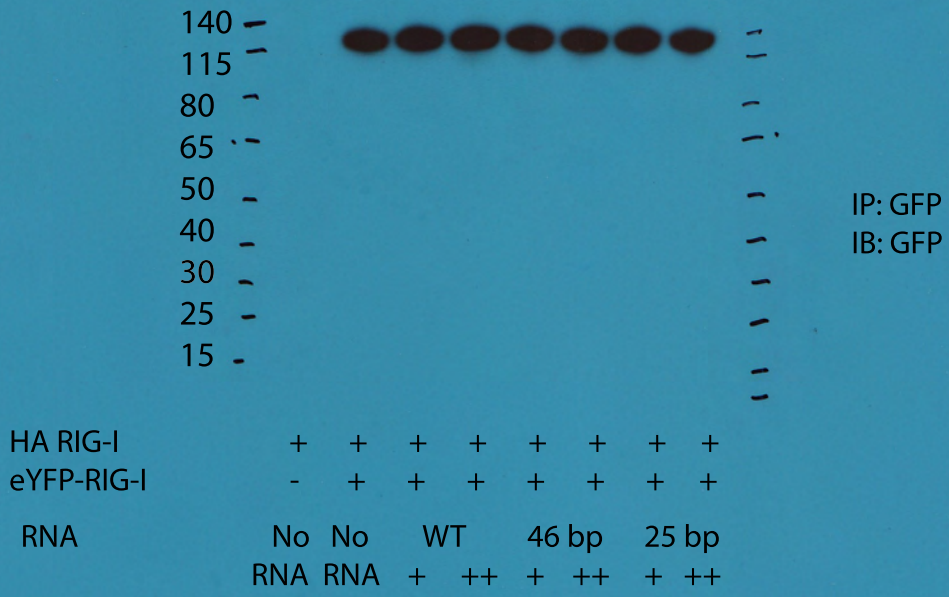



289mi  
-244

Figure 3D

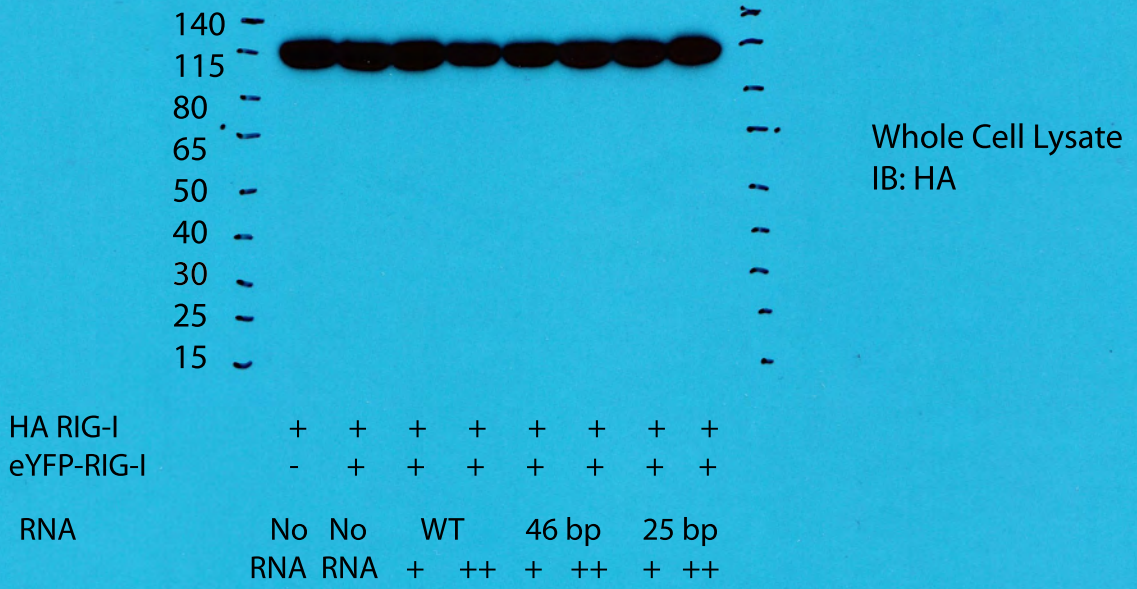



Figure 3E

1 2 3 4 5 6 7

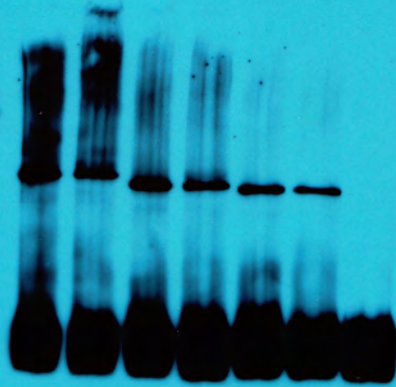

Native PAGE  
IB: RIG-I

Supplement: embor2013102df3.pdf [file embor2013102df3.pdf]
